# Supplementary material for: Crystal structure transformation and step-by-step thermal decomposition behavior of dihydroxylammonium 5,5′-bistetrazole-1,1′-diolate
Source: Royal Society of Chemistry journal article supplement (doi:10.1039/c7ra08816g), 2017-01-01
Supplement: c7ra08816g1.pdf [file c7ra08816g1.pdf]

# Crystal structure transformation and step-by-step thermal decomposition behavior of dihydroxylammonium 5,5'-bistetrazole-1,1'-diolate

Jianhui Jia,<sup>a,b\*</sup> Yu Liu,<sup>b</sup> Shiliang Huang,<sup>b</sup> Jinjiang Xu,<sup>\*b</sup> Shichun Li,<sup>b</sup> Haobin Zhang,<sup>b</sup> Xiong Cao<sup>\*a</sup>

## Contents

|                                                                                                                                                                                                                            |   |
|----------------------------------------------------------------------------------------------------------------------------------------------------------------------------------------------------------------------------|---|
| Table S1 Lattice parameters of TKX-50 refined from X-ray diffraction data.....                                                                                                                                             | 2 |
| Fourier Transform Infrared Spectroscopy characterization of the main intermediate product                                                                                                                                  | 2 |
| Characterization of ABTOX .....                                                                                                                                                                                            | 3 |
| Table S2 Crystal data and structure refinement details for ABTOX at 296K.....                                                                                                                                              | 3 |
| Table S4 Bond lengths (Å), angles (deg) for ABTOX.....                                                                                                                                                                     | 4 |
| Table S5 Anisotropic displacement parameters (Å <sup>2</sup> × 10 <sup>3</sup> ) for ABTOX. The anisotropic displacement factor exponent takes the form: $-2 \pi^2 [ h^2 a^{*2} U_{11} + \dots + 2 h k a^* b^* U_{12} ]$ . | 6 |
| Table S6 Hydrogen coordinates ( × 10 <sup>4</sup> ) and isotropic displacement parameters (Å <sup>2</sup> × 10 <sup>3</sup> ) for ABTOX. ....                                                                              | 7 |

**Table S1 Lattice parameters of TKX-50 refined from X-ray diffraction data.**

| T(°C) | a(Å)    | b(Å)     | c(Å)    | $\beta$ (°) | Volume(Å <sup>3</sup> ) |
|-------|---------|----------|---------|-------------|-------------------------|
| 30    | 5.43027 | 11.73754 | 6.55503 | 95.09271    | 416.15511               |
| 40    | 5.42885 | 11.74634 | 6.5577  | 95.06889    | 416.54324               |
| 50    | 5.42869 | 11.75677 | 6.56126 | 95.04905    | 417.13995               |
| 60    | 5.42759 | 11.76182 | 6.56179 | 95.02958    | 417.28096               |
| 70    | 5.42738 | 11.77116 | 6.56496 | 95.01165    | 417.80908               |
| 80    | 5.42663 | 11.77906 | 6.56757 | 94.99583    | 418.20815               |
| 90    | 5.42596 | 11.78494 | 6.56861 | 94.97622    | 418.44396               |
| 100   | 5.42564 | 11.79563 | 6.57218 | 94.95797    | 419.03818               |
| 110   | 5.42568 | 11.80018 | 6.57278 | 94.94274    | 419.25088               |
| 120   | 5.42551 | 11.81087 | 6.57651 | 94.92525    | 419.86641               |
| 125   | 5.42507 | 11.81067 | 6.57552 | 94.91674    | 419.76767               |
| 130   | 5.42571 | 11.81806 | 6.57833 | 94.90666    | 420.26602               |
| 135   | 5.42536 | 11.82135 | 6.57987 | 94.90386    | 420.45582               |
| 140   | 5.42508 | 11.82318 | 6.57946 | 94.89723    | 420.4773                |
| 145   | 5.42539 | 11.82684 | 6.58021 | 94.88794    | 420.68501               |
| 150   | 5.42487 | 11.83144 | 6.5818  | 94.87426    | 420.91862               |
| 155   | 5.42487 | 11.83533 | 6.58303 | 94.8667     | 421.14075               |
| 160   | 5.42513 | 11.83608 | 6.58242 | 94.85825    | 421.15357               |
| 165   | 5.42524 | 11.8418  | 6.5848  | 94.85186    | 421.5218                |
| 170   | 5.42566 | 11.84819 | 6.58673 | 94.84437    | 421.911                 |
| 175   | 5.42567 | 11.85086 | 6.5879  | 94.83339    | 422.0888                |

#### **Fourier Transform Infrared Spectroscopy characterization of the main intermediate product**

Fourier Transform Infrared Spectroscopy characterization was utilized to analysis the main intermediate product. The data was collected by Nicolet 6700. The resolution ratio of instrument was 4 cm<sup>-1</sup> and the scan range from 400 cm<sup>-1</sup> to 4000 cm<sup>-1</sup>. The raw TKX-50 and materials after initial decomposition by in-situ XRD at different temperatures were tested. We found that the absorption bands of tetrazole (729, 998, 1165, 1234cm<sup>-1</sup>) were kept same, and cation moiety was converted to NH<sub>4</sub><sup>+</sup> (1403, 2851, 3056, 3184 cm<sup>-1</sup>) at last with the increase temperature. Therefore, the intermediate product was presumed to be ABTOX. The obtained IR spectrograms are shown in Fig.S1.

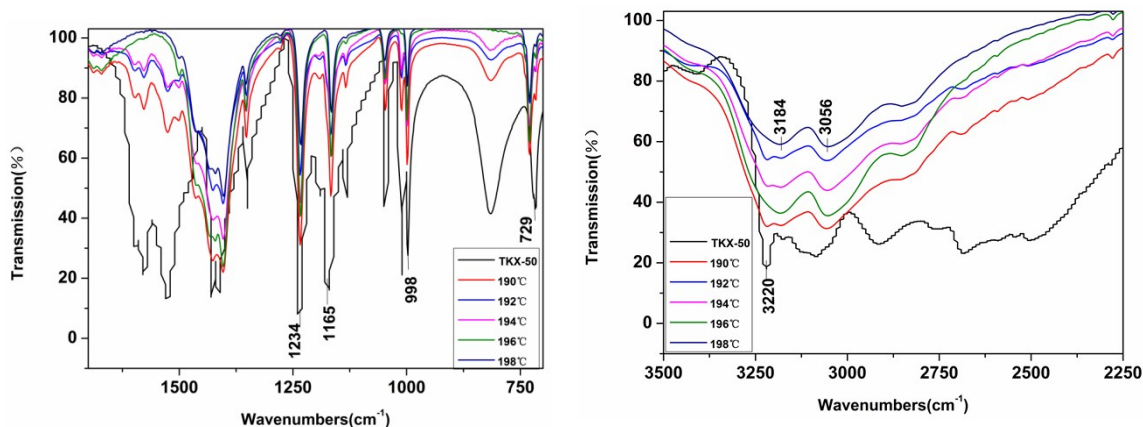

**Fig. S1** The IR spectrograms of materials after initial decomposition by in-situ XRD at different temperatures

### Characterization of ABTOX

The molecular structure of ABTOX was shown in Fig. S2, and the anion moiety in the crystal structure of ABTOX was disorder. The detailed crystallographic data and structure refinements are shown in Table S2. About the reason of the different structure with reported, a more advanced space group was used for structural analysis in our study. That is to say, if I222 space group can be used to solve the structure, I-4 can also solve the crystal structure. Conversely, if I-4 can solve the crystal structure, the I222 space group can not necessarily solve the structure. Compared the unit cell parameters with the reported, no particular difference is found and the same crystal structure can be considered.

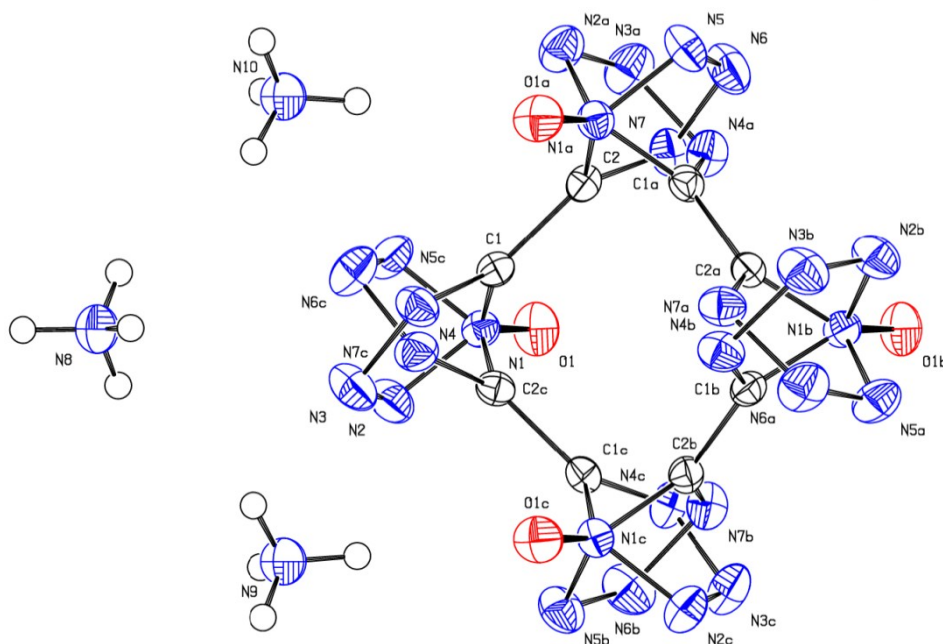

**Fig. S2** Molecular structure of ABTOX.**Table S2** Crystal data and structure refinement details for ABTOX at 296K.

|                                            |                                                              |
|--------------------------------------------|--------------------------------------------------------------|
| Empirical formula                          | C <sub>2</sub> H <sub>8</sub> N <sub>10</sub> O <sub>2</sub> |
| Formula weight                             | 204.18                                                       |
| Temperature                                | 296 K                                                        |
| Wavelength(Å)                              | 0.71073                                                      |
| Crystal system                             | Tetragonal                                                   |
| Space group                                | I -4                                                         |
| Z                                          | 4                                                            |
| Unit cell dimensions                       |                                                              |
| a (Å)                                      | 7.5982(12)                                                   |
| b (Å)                                      | 7.5982(12)                                                   |
| c (Å)                                      | c = 13.294(3)                                                |
| α (°)                                      | 90                                                           |
| β (°)                                      | 90                                                           |
| γ (°)                                      | 90                                                           |
| Volume (Å <sup>3</sup> )                   | 767.5(3)                                                     |
| D <sub>calc</sub> (Mg/m <sup>3</sup> )     | 1.767                                                        |
| Absorption coefficient (mm <sup>-1</sup> ) | 0.151                                                        |
| F(000)                                     | 424                                                          |
| Crystal size (mm)                          | 0.15 x 0.12 x 0.08                                           |
| θ                                          | 3.065° to 30.682°                                            |
| Index ranges                               | -9<=h<=10, -10<=k<=10, -18<=l<=19                            |
| Reflections collected                      | 3930                                                         |
| Completeness to theta (%)                  | 100                                                          |
| Goodness-of-fit on F <sup>2</sup>          | 1.078                                                        |
| Final R indices [I>2σ(I)]                  | R1 = 0.0389, wR2 = 0.0967                                    |
| CCDC                                       | 1567754                                                      |

**Table S3** Atomic coordinates ( x 10<sup>4</sup>) and equivalent isotropic displacement parameters (Å<sup>2</sup>x 10<sup>3</sup>)

for ABTOX. U (eq) is defined as one third of the trace of the orthogonalized U<sup>ij</sup> tensor.

|       | x       | y         | z       | U(eq) |
|-------|---------|-----------|---------|-------|
| O(1)  | 7735(3) | 7735(3)   | 3433(1) | 29(1) |
| N(1)  | 7752(3) | 7754(3)   | 4428(1) | 20(1) |
| N(2)  | 7761(6) | 6216(5)   | 4916(5) | 29(1) |
| N(3)  | 7826(6) | 6583(6)   | 5878(4) | 32(1) |
| N(4)  | 7868(9) | 8351(9)   | 6030(6) | 24(1) |
| C(1)  | 7791(5) | 9070(5)   | 5111(4) | 18(1) |
| N(8)  | 5000    | 5000      | 7244(2) | 28(1) |
| N(9)  | 10000   | 5000      | 7500    | 28(1) |
| N(10) | 5000    | 10000     | 7500    | 28(1) |
| N(5)  | 7755(5) | 13789(5)  | 5086(5) | 29(1) |
| N(6)  | 7824(6) | 13417(6)  | 4128(4) | 33(1) |
| N(7)  | 7854(9) | 11661(10) | 3973(7) | 25(1) |

C(2) 7794(6) 10935(5) 4889(4) 18(1)

**Table S4** Bond lengths (Å), angles (deg) for ABTOX.

|                    |           |                    |           |
|--------------------|-----------|--------------------|-----------|
| O(1)-N(1)          | 1.322(2)  | N(8)-H(8A)         | 0.82(2)   |
| N(1)-N(2)          | 1.337(5)  | N(8)-H(8B)         | 0.86(2)   |
| N(1)-C(1)          | 1.351(5)  | N(9)-H(9)          | 0.88(2)   |
| N(1)-N(5)#1        | 1.338(5)  | N(10)-H(10)        | 0.87(2)   |
| N(1)-C(2)#1        | 1.350(5)  | N(5)-N(1)#3        | 1.338(5)  |
| N(2)-N(3)          | 1.310(8)  | N(5)-N(2)#4        | 1.858(5)  |
| N(2)-N(5)#1        | 1.660(5)  | N(5)-N(2)#3        | 1.659(5)  |
| N(2)-N(5)#2        | 1.858(5)  | N(5)-C(1)#3        | 1.584(6)  |
| N(2)-C(2)#1        | 1.577(6)  | N(5)-N(6)          | 1.305(8)  |
| N(3)-N(4)          | 1.359(8)  | N(6)-N(3)#3        | 1.335(5)  |
| N(3)-N(6)#1        | 1.335(5)  | N(6)-N(4)#3        | 1.076(10) |
| N(3)-N(7)#1        | 1.060(10) | N(6)-C(1)#3        | 1.662(6)  |
| N(3)-C(2)#1        | 1.664(6)  | N(6)-N(7)          | 1.350(8)  |
| N(4)-C(1)          | 1.339(10) | N(7)-N(3)#3        | 1.060(10) |
| N(4)-N(6)#1        | 1.076(10) | N(7)-N(4)#3        | 0.520(5)  |
| N(4)-N(7)#1        | 0.520(5)  | N(7)-C(1)#3        | 1.584(9)  |
| N(4)-C(2)#1        | 1.580(9)  | N(7)-C(2)          | 1.337(10) |
| C(1)-N(5)#1        | 1.584(6)  | C(2)-N(1)#3        | 1.350(5)  |
| C(1)-N(6)#1        | 1.662(6)  | C(2)-N(2)#3        | 1.577(6)  |
| C(1)-N(7)#1        | 1.584(9)  | C(2)-N(3)#3        | 1.664(6)  |
| C(1)-C(2)          | 1.448(5)  | C(2)-N(4)#3        | 1.580(9)  |
| C(1)-C(2)#1        | 1.370(5)  | C(2)-C(1)#3        | 1.370(5)  |
| <hr/>              |           |                    |           |
| O(1)-N(1)-N(2)     | 118.4(3)  | C(2)-C(1)-N(6)#1   | 133.0(4)  |
| O(1)-N(1)-C(1)     | 132.9(3)  | C(2)-C(1)-N(7)#1   | 136.7(5)  |
| O(1)-N(1)-N(5)#1   | 118.4(3)  | C(2)#1-C(1)-N(7)#1 | 53.2(4)   |
| O(1)-N(1)-C(2)#1   | 132.9(3)  | C(2)#1-C(1)-C(2)   | 133.8(5)  |
| N(2)-N(1)-C(1)     | 108.7(4)  | H(8A)-N(8)-H(8B)   | 111(5)    |
| N(2)-N(1)-N(5)#1   | 76.7(3)   | N(1)#3-N(5)-N(2)#4 | 158.0(4)  |
| N(2)-N(1)-C(2)#1   | 71.9(3)   | N(1)#3-N(5)-N(2)#3 | 51.6(3)   |
| N(5)#1-N(1)-C(1)   | 72.2(3)   | N(1)#3-N(5)-C(1)#3 | 54.3(2)   |
| N(5)#1-N(1)-C(2)#1 | 108.7(4)  | N(2)#3-N(5)-N(2)#4 | 134.9(4)  |
| C(2)#1-N(1)-C(1)   | 60.9(3)   | C(1)#3-N(5)-N(2)#3 | 84.6(3)   |
| N(1)-N(2)-N(5)#2   | 157.9(4)  | C(1)#3-N(5)-N(2)#4 | 137.0(3)  |
| N(1)-N(2)-N(5)#1   | 51.7(3)   | N(6)-N(5)-N(1)#3   | 106.4(4)  |
| N(1)-N(2)-C(2)#1   | 54.4(3)   | N(6)-N(5)-N(2)#3   | 82.8(4)   |
| N(3)-N(2)-N(1)     | 106.7(4)  | N(6)-N(5)-N(2)#4   | 95.5(3)   |
| N(3)-N(2)-N(5)#1   | 83.0(4)   | N(6)-N(5)-C(1)#3   | 69.5(4)   |
| N(3)-N(2)-N(5)#2   | 95.3(3)   | N(3)#3-N(6)-C(1)#3 | 90.8(4)   |
| N(3)-N(2)-C(2)#1   | 69.7(4)   | N(3)#3-N(6)-N(7)   | 46.5(4)   |

|                    |          |                    |           |
|--------------------|----------|--------------------|-----------|
| N(5)#1-N(2)-N(5)#2 | 134.3(4) | N(4)#3-N(6)-N(3)#3 | 67.6(4)   |
| C(2)#1-N(2)-N(5)#2 | 137.4(3) | N(4)#3-N(6)-C(1)#3 | 53.5(5)   |
| C(2)#1-N(2)-N(5)#1 | 84.8(3)  | N(4)#3-N(6)-N(5)   | 113.7(6)  |
| N(2)-N(3)-N(4)     | 110.9(6) | N(4)#3-N(6)-N(7)   | 21.1(4)   |
| N(2)-N(3)-N(6)#1   | 96.8(5)  | N(5)-N(6)-N(3)#3   | 97.5(5)   |
| N(2)-N(3)-C(2)#1   | 62.7(3)  | N(5)-N(6)-C(1)#3   | 63.2(3)   |
| N(4)-N(3)-C(2)#1   | 62.0(4)  | N(5)-N(6)-N(7)     | 111.3(6)  |
| N(6)#1-N(3)-N(4)   | 47.1(4)  | N(7)-N(6)-C(1)#3   | 62.4(4)   |
| N(6)#1-N(3)-C(2)#1 | 90.4(4)  | N(3)#3-N(7)-C(1)#3 | 106.9(7)  |
| N(7)#1-N(3)-N(2)   | 113.0(6) | N(3)#3-N(7)-N(6)   | 66.0(5)   |
| N(7)#1-N(3)-N(4)   | 20.4(5)  | N(3)#3-N(7)-C(2)   | 87.1(6)   |
| N(7)#1-N(3)-N(6)#1 | 67.5(4)  | N(4)#3-N(7)-N(3)#3 | 114(2)    |
| N(7)#1-N(3)-C(2)#1 | 53.3(5)  | N(4)#3-N(7)-C(1)#3 | 53.2(16)  |
| N(3)-N(4)-C(2)#1   | 68.5(4)  | N(4)#3-N(7)-N(6)   | 48.2(17)  |
| C(1)-N(4)-N(3)     | 105.5(6) | N(4)#3-N(7)-C(2)   | 108.4(19) |
| C(1)-N(4)-C(2)#1   | 55.2(4)  | N(6)-N(7)-C(1)#3   | 68.5(4)   |
| N(6)#1-N(4)-N(3)   | 65.3(5)  | C(2)-N(7)-C(1)#3   | 55.1(4)   |
| N(6)#1-N(4)-C(1)   | 86.2(6)  | C(2)-N(7)-N(6)     | 105.6(7)  |
| N(6)#1-N(4)-C(2)#1 | 105.8(7) | N(1)#3-C(2)-N(2)#3 | 53.7(3)   |
| N(7)#1-N(4)-N(3)   | 45.3(17) | N(1)#3-C(2)-N(3)#3 | 89.0(3)   |
| N(7)#1-N(4)-C(1)   | 109(2)   | N(1)#3-C(2)-N(4)#3 | 95.8(4)   |
| N(7)#1-N(4)-N(6)#1 | 111(2)   | N(1)#3-C(2)-C(1)#3 | 59.6(3)   |
| N(7)#1-N(4)-C(2)#1 | 53.4(17) | N(1)#3-C(2)-C(1)   | 125.9(4)  |
| N(1)-C(1)-N(5)#1   | 53.5(3)  | N(2)#3-C(2)-N(3)#3 | 47.6(3)   |
| N(1)-C(1)-N(6)#1   | 88.6(3)  | N(2)#3-C(2)-N(4)#3 | 88.3(5)   |
| N(1)-C(1)-N(7)#1   | 95.2(4)  | N(4)#3-C(2)-N(3)#3 | 49.4(3)   |
| N(1)-C(1)-C(2)#1   | 59.5(3)  | C(1)-C(2)-N(2)#3   | 125.5(4)  |
| N(1)-C(1)-C(2)     | 126.0(4) | C(1)#3-C(2)-N(2)#3 | 95.4(3)   |
| N(4)-C(1)-N(1)     | 108.2(4) | C(1)-C(2)-N(3)#3   | 132.7(4)  |
| N(4)-C(1)-N(5)#1   | 85.8(5)  | C(1)#3-C(2)-N(3)#3 | 89.6(4)   |
| N(4)-C(1)-N(6)#1   | 40.2(4)  | C(1)#3-C(2)-N(4)#3 | 53.4(4)   |
| N(4)-C(1)-N(7)#1   | 18.1(4)  | C(1)-C(2)-N(4)#3   | 136.2(5)  |
| N(4)-C(1)-C(2)#1   | 71.3(4)  | C(1)#3-C(2)-C(1)   | 133.8(5)  |
| N(4)-C(1)-C(2)     | 125.8(5) | N(7)-C(2)-N(1)#3   | 108.0(5)  |
| N(5)#1-C(1)-N(6)#1 | 47.3(3)  | N(7)-C(2)-N(2)#3   | 85.2(5)   |
| N(5)#1-C(1)-N(7)#1 | 87.6(5)  | N(7)-C(2)-N(3)#3   | 39.5(4)   |
| N(7)#1-C(1)-N(6)#1 | 49.1(4)  | N(7)-C(2)-N(4)#3   | 18.2(3)   |
| C(2)-C(1)-N(5)#1   | 125.8(4) | N(7)-C(2)-C(1)     | 126.1(5)  |
| C(2)#1-C(1)-N(5)#1 | 95.1(4)  | N(7)-C(2)-C(1)#3   | 71.6(4)   |
| C(2)#1-C(1)-N(6)#1 | 89.2(4)  |                    |           |

Symmetry transformations used to generate equivalent atoms:

#1 -y+2,x,-z+1    #2 x,y-1,z    #3 y,-x+2,-z+1

#4 x,y+1,z

**Table S5** Anisotropic displacement parameters ( $\text{\AA}^2 \times 10^3$ ) for ABTOX. The anisotropic displacement factor exponent takes the form:  $-2\pi^2[h^2 a^{*2}U^{11} + \dots + 2 h k a^* b^* U^{12}]$ .

|       | U <sub>11</sub> | U <sub>22</sub> | U <sub>33</sub> | U <sub>23</sub> | U <sub>13</sub> | U <sub>12</sub> |
|-------|-----------------|-----------------|-----------------|-----------------|-----------------|-----------------|
| O(1)  | 35(1)           | 34(1)           | 17(1)           | -1(1)           | -2(1)           | -5(1)           |
| N(1)  | 19(1)           | 21(1)           | 19(1)           | 0(1)            | 0(1)            | 1(1)            |
| N(2)  | 37(2)           | 20(2)           | 30(3)           | 2(2)            | 1(2)            | 2(2)            |
| N(3)  | 44(3)           | 23(2)           | 29(3)           | 6(2)            | -1(2)           | 3(2)            |
| N(4)  | 31(4)           | 22(3)           | 21(2)           | 4(3)            | 0(3)            | 4(2)            |
| C(1)  | 15(2)           | 21(2)           | 20(3)           | 0(2)            | -1(2)           | 1(1)            |
| N(8)  | 29(2)           | 29(2)           | 26(1)           | 0               | 0               | -4(1)           |
| N(9)  | 31(1)           | 31(1)           | 23(2)           | 0               | 0               | 0               |
| N(10) | 31(1)           | 31(1)           | 21(2)           | 0               | 0               | 0               |
| N(5)  | 39(2)           | 18(2)           | 30(2)           | 4(2)            | -1(2)           | -2(2)           |
| N(6)  | 45(3)           | 25(2)           | 29(3)           | 7(2)            | 3(2)            | -1(2)           |
| N(7)  | 27(4)           | 26(4)           | 22(2)           | 4(3)            | 0(3)            | -5(2)           |
| C(2)  | 16(2)           | 20(2)           | 19(2)           | -2(2)           | 2(2)            | -1(1)           |

**Table S6** Hydrogen coordinates ( $\times 10^4$ ) and isotropic displacement parameters ( $\text{\AA}^2 \times 10^3$ ) for ABTOX.

|       | x         | y         | z        | U(eq)  |
|-------|-----------|-----------|----------|--------|
| H(8A) | 5600(70)  | 4390(70)  | 6870(30) | 97(16) |
| H(8B) | 5660(60)  | 5680(50)  | 7600(20) | 69(13) |
| H(9)  | 10540(40) | 5660(40)  | 7060(30) | 42(9)  |
| H(10) | 5640(40)  | 10540(40) | 7050(30) | 44(10) |
